# Supplementary material for: Effects of Piperazine Derivative on Paclitaxel Pharmacokinetics
Source: Pharmaceutics. 2019 Jan 8;11(1):23. doi: 10.3390/pharmaceutics11010023 (PMC6359037; doi:10.3390/pharmaceutics11010023)
Supplement: Supplementary file 1 [file pharmaceutics-11-00023-s001.pdf]

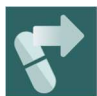

## Supplementary Materials: Effects of piperazine derivative on paclitaxel pharmacokinetics

Jaeok Lee, Song Wha Chae, A Reum Oh, Ji Hye Yoo, Hea-Young Park Choo, Sandy Jeong Rhie, and Hwa Jeong Lee

**Table S1.** The toxic effect of each derivative in MCF-7/ADR cells after 2 h incubation.

| Comp Conc. ( $\mu\text{M}$ ) | 1     | 2      | 3      | 4      | 5      | 6      |
|------------------------------|-------|--------|--------|--------|--------|--------|
| 5                            | 89.77 | 102.70 | 102.03 | 100.76 | 101.71 | 100.72 |
| 10                           | 90.47 | 102.87 | 101.69 | 98.50  | 87.22  | 101.38 |
| 25                           | 89.23 | 86.94  | 102.24 | 96.14  | 83.46  | 100.76 |
| 50                           | 88.56 | 86.10  | 86.26  | 96.90  | 83.84  | 85.68  |
| 100                          | 87.21 | 87.75  | 85.90  | 87.63  | 81.94  | 82.91  |

The numerical data were represented the cell survival ratio.
